# Supplementary material for: Sorption and Desorption Studies of Pb(II) and Ni(II) from Aqueous Solutions by a New Composite Based on Alginate and Magadiite Materials
Source: PubMed Central journal article supplement (PMC6419164; doi:10.3390/polym11020340), 2019-02-15
Supplement: polymers-11-00340-s001.pdf [file polymers-11-00340-s001.pdf]

Supplementary materials:

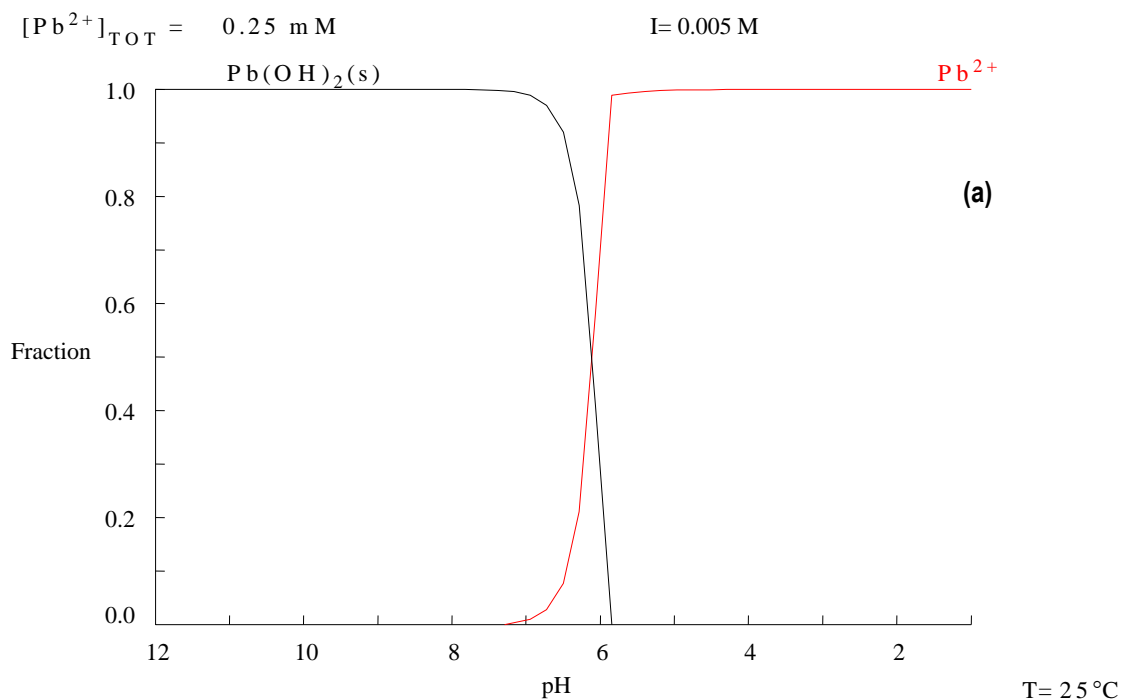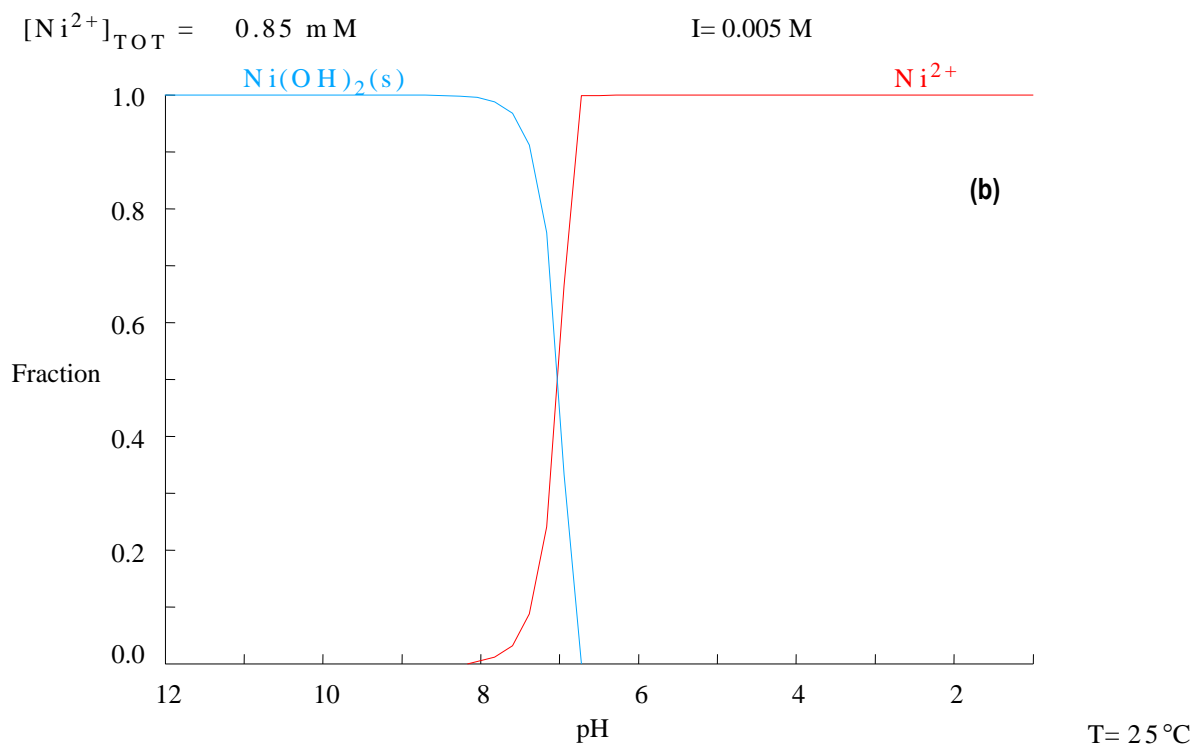

**Figure S1.** Metal species as a function of pH.

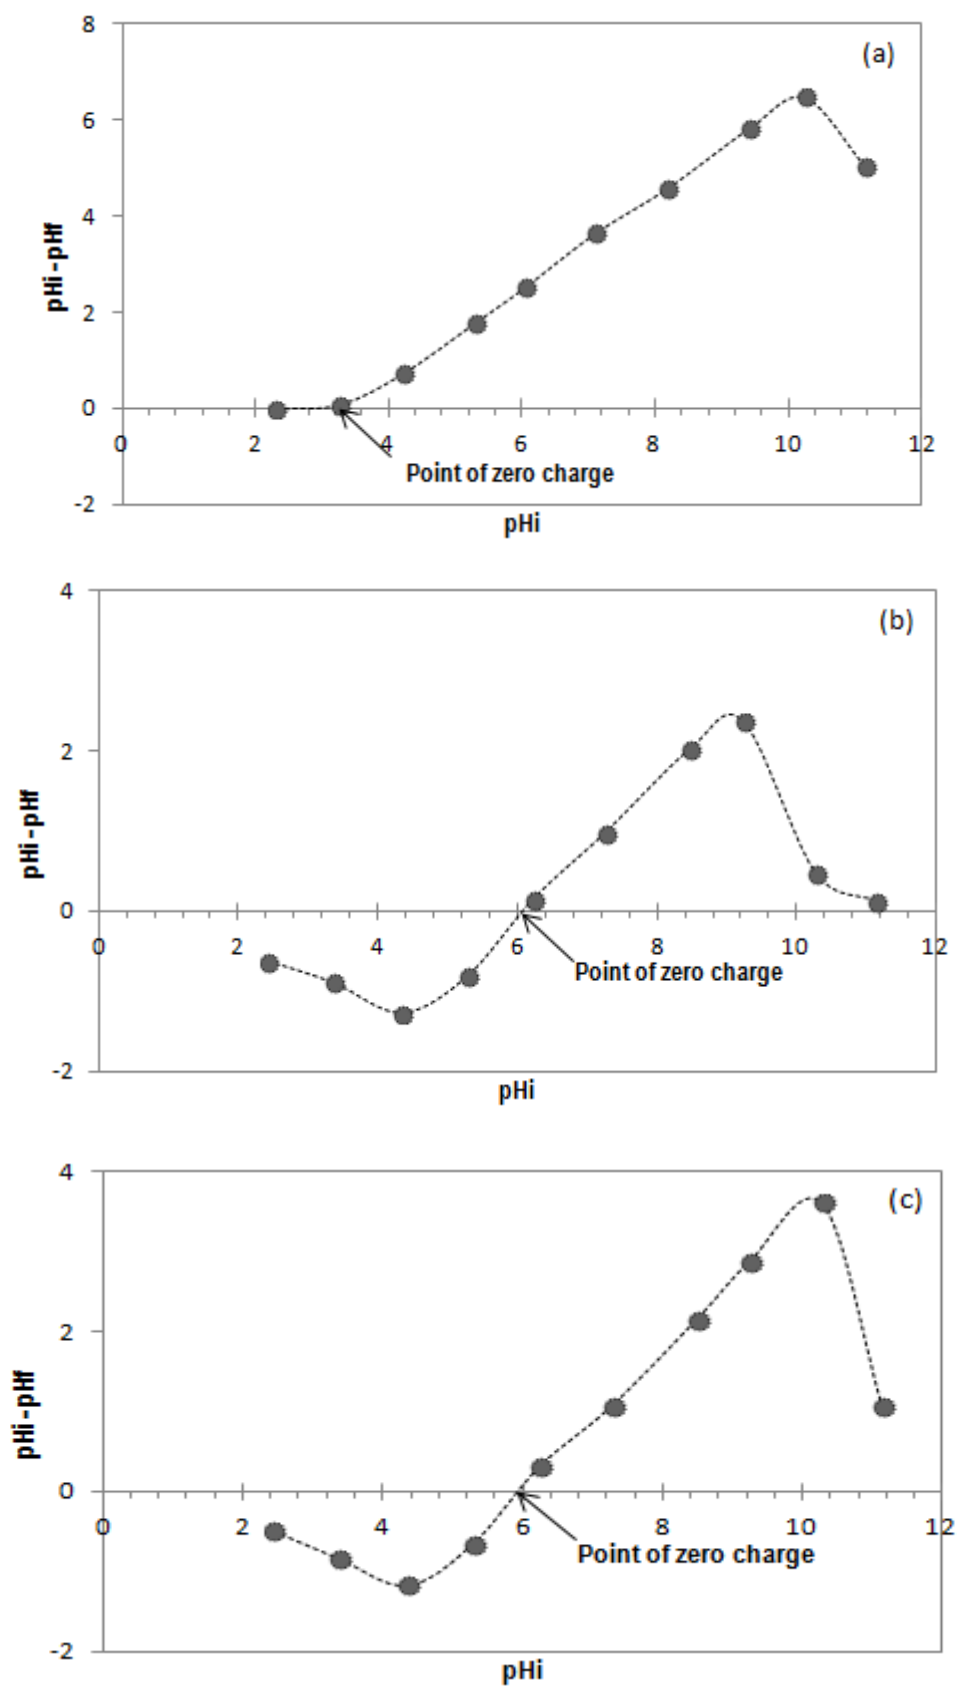

Figure S2. Points of zero charge of different sorbents. (a) HM-D2EHPA; (b) CA; (c) CAM-D2EHPA

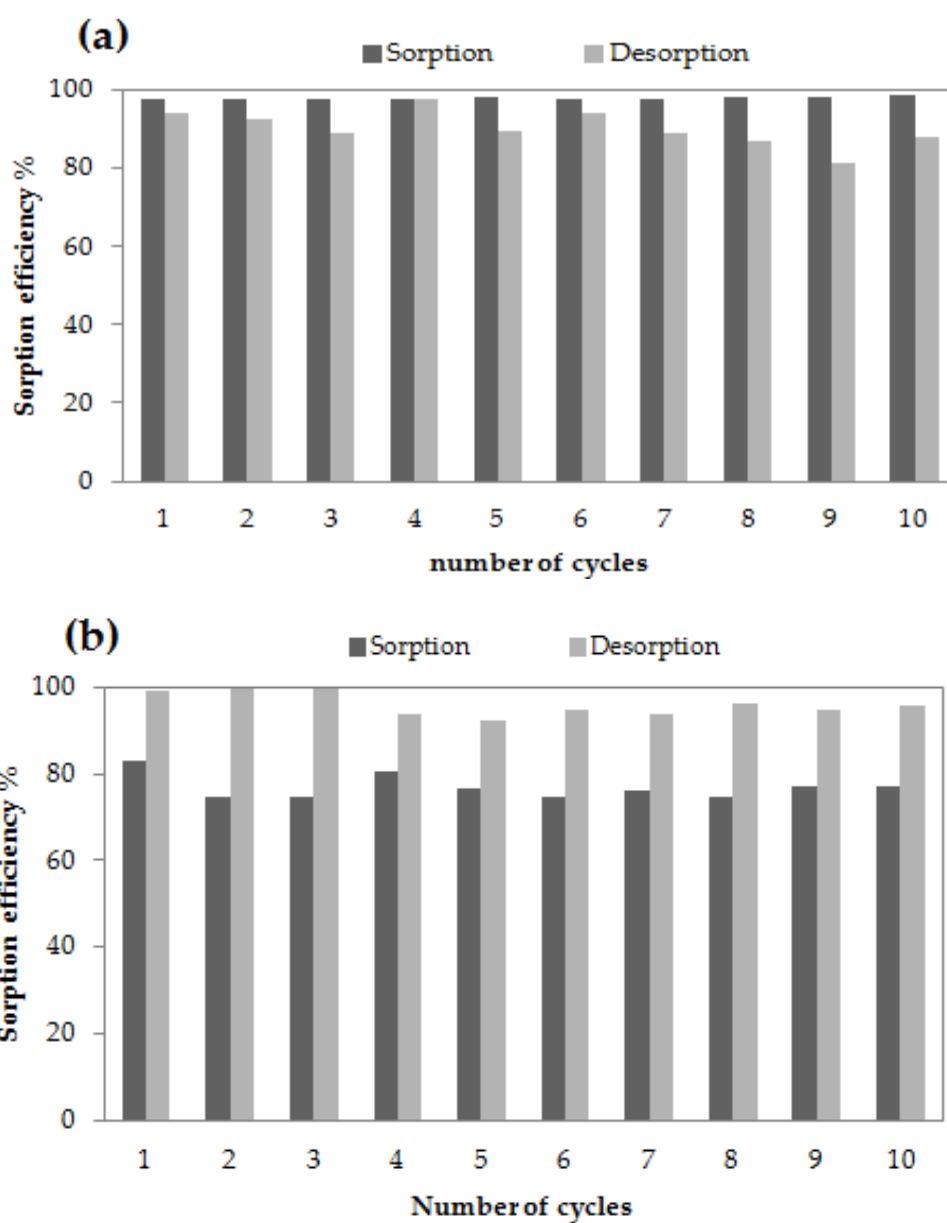

**Figure S3.** Sorption and desorption efficiency of lead (a) and nickel (b) by CAM-D2EHPA material. (T: 20 °C; sorbent dosage, SD: 10 g L<sup>-1</sup>; agitation speed: 180 rpm; contact time: 3 h; C<sub>0</sub>: 50 mg L<sup>-1</sup>; C (HNO<sub>3</sub>): 0.5 M; time of desorption: 30 min).

**Table S1.** Langmuir, Freundlich, and Sips constants of CA material.

| Metal  | Langmuir                                   |                                            |                                 | Freundlich |                                                                    |       | Sips  |                                            |                                 |       |       |
|--------|--------------------------------------------|--------------------------------------------|---------------------------------|------------|--------------------------------------------------------------------|-------|-------|--------------------------------------------|---------------------------------|-------|-------|
|        | $q_{\text{exp}}$<br>( $\text{mg g}^{-1}$ ) | $q_{\text{max}}$<br>( $\text{mg g}^{-1}$ ) | $k_L$<br>( $\text{L mg}^{-1}$ ) | $r^2$      | $k_F$<br>( $\text{mg}^{1-1/n} \text{g}^{-1}$<br>$\text{L}^{1/n}$ ) | $n_F$ | $r^2$ | $q_{\text{max}}$<br>( $\text{mg g}^{-1}$ ) | $k_s$<br>( $\text{L mg}^{-1}$ ) | $n_s$ | $r^2$ |
| Pb(II) | 197.7                                      | 203.0                                      | 0.023                           | 0.989      | 27.00                                                              | 3.22  | 0.956 | 217.55                                     | 0.036                           | 1.20  | 0.991 |
| Ni(II) | 47.6                                       | 51.32                                      | 0.020                           | 0.995      | 9.31                                                               | 3.97  | 0.956 | 53.83                                      | 0.034                           | 1.19  | 0.997 |

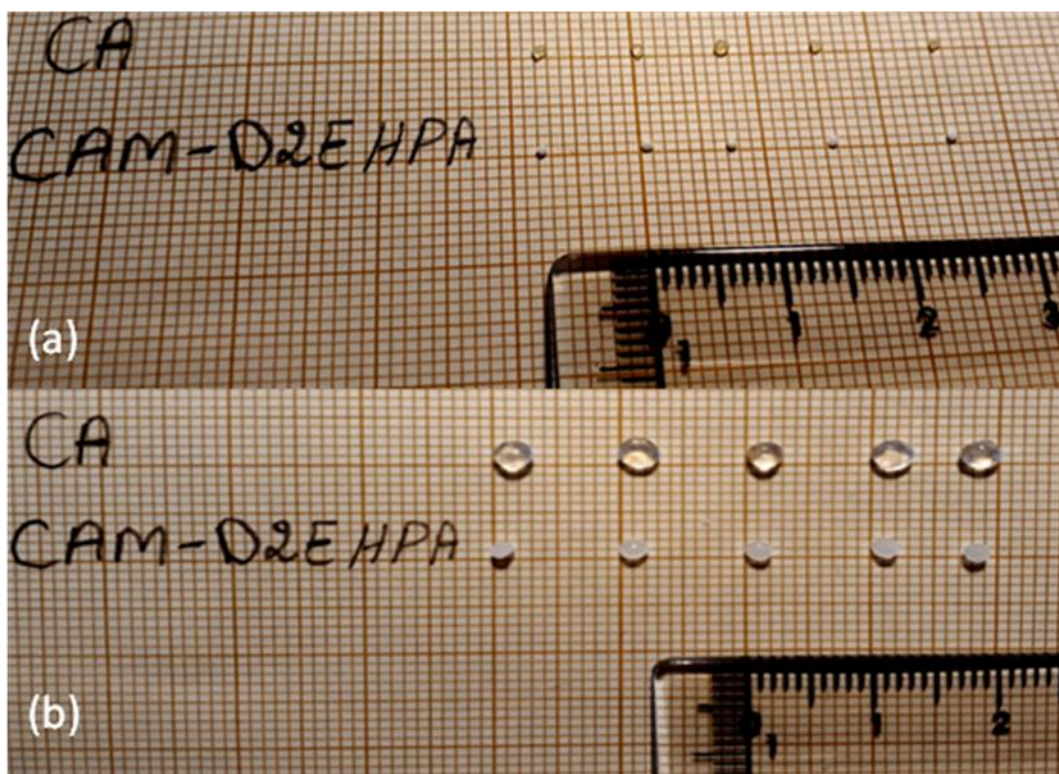

**Figure S4.** Images of calcium alginate beads, and CAM-D2EHPA hybrid beads; a) before adsorption, b) after adsorption
